# Supplementary material
Source: PubMed Central journal article supplement (PMC2856706)

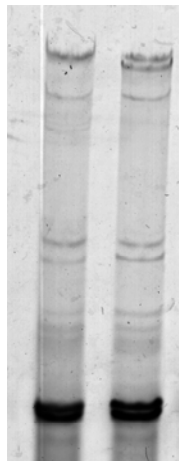

d1 d30  
SOLEUS

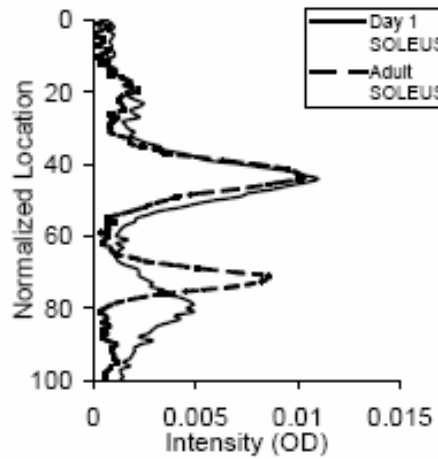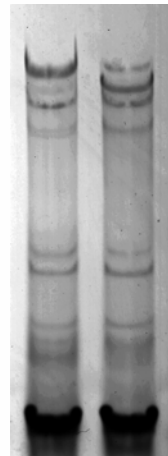

d1 d30  
TC

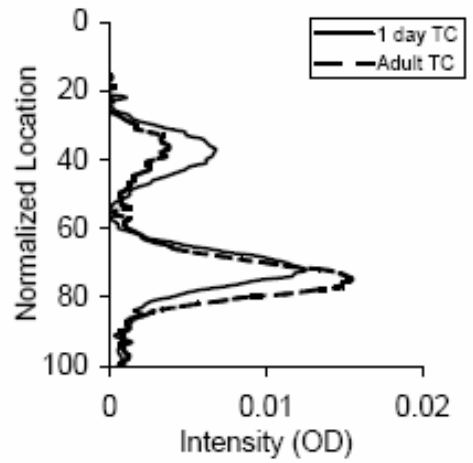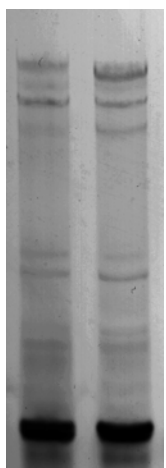

d1 d30  
EDL

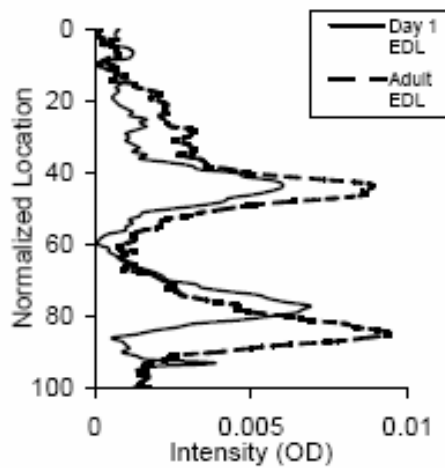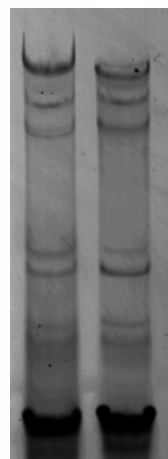

d1 d30  
GAST

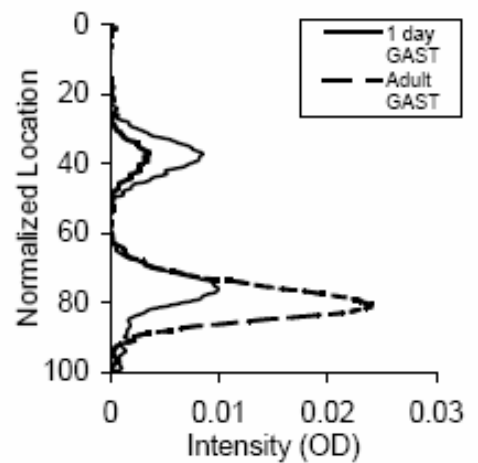

Supplemental Figure 1

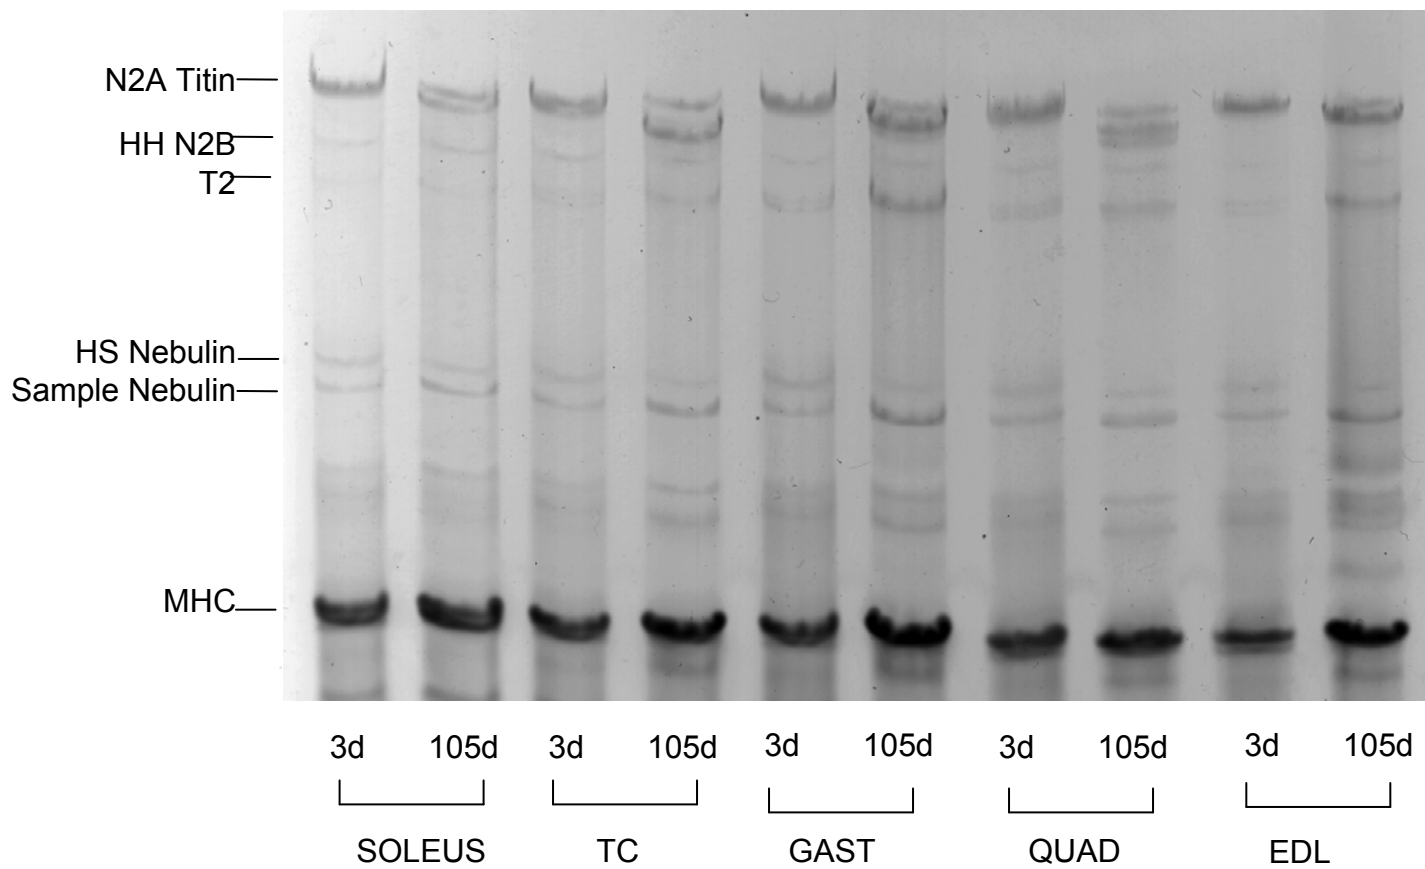

Supplemental Figure S2

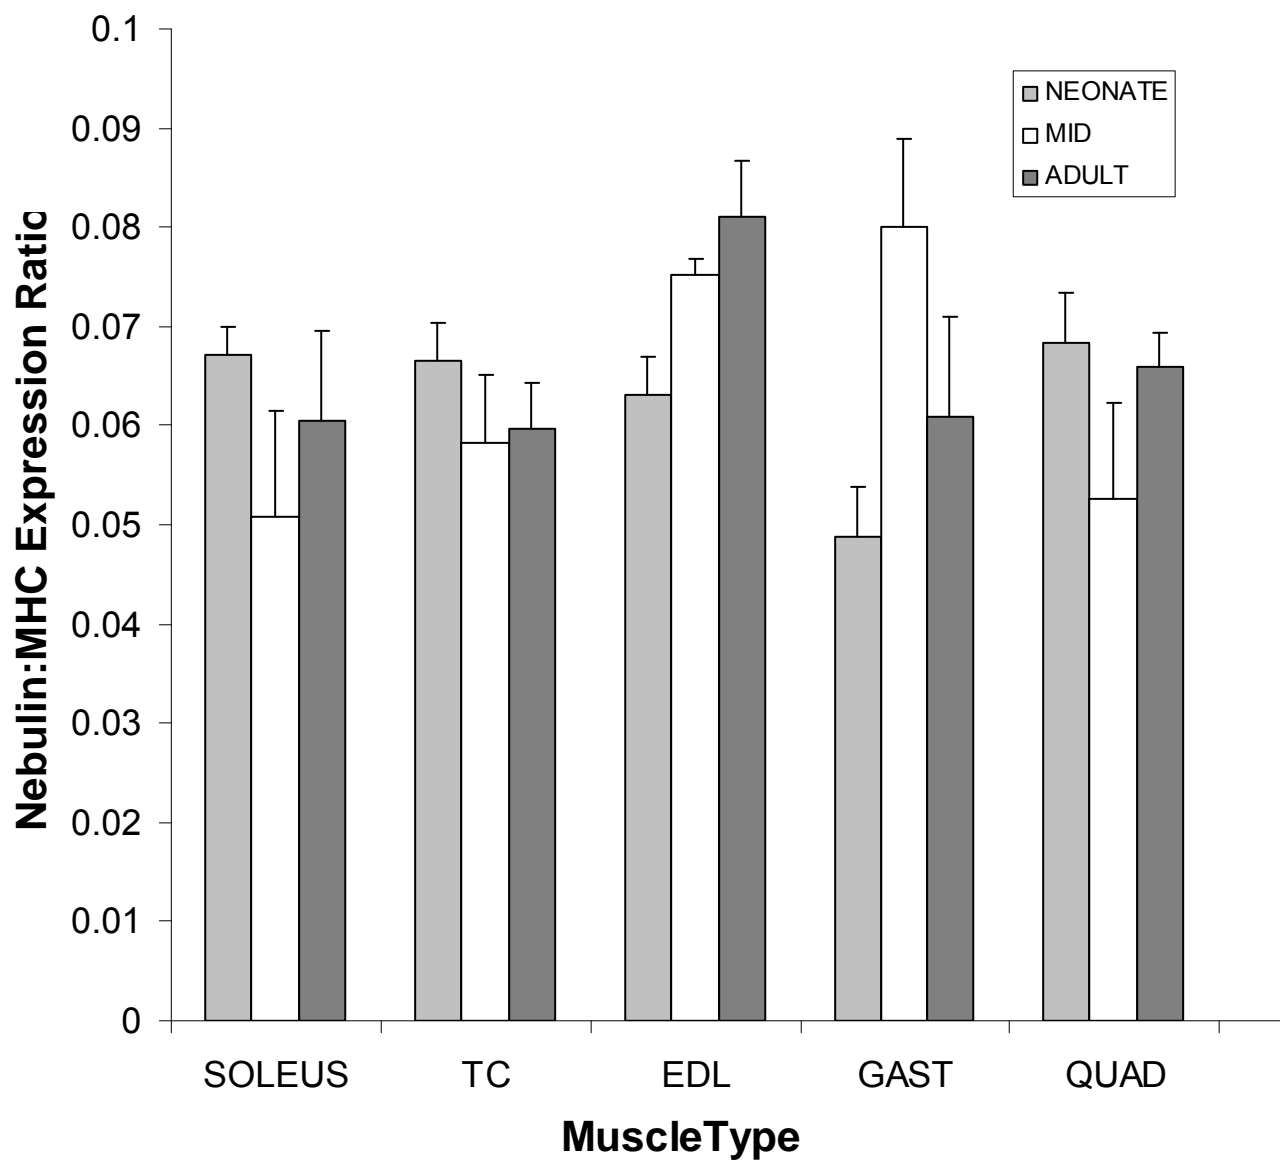

Supplemental Figure 3

Supplement: NIHMS182462-supplement-01.pdf [file NIHMS182462-supplement-01.pdf]
